1 **Chemical constituents involved in e-cigarette, or vaping product use-associated**  
2 **lung injury (EVALI)**

3  
4 Thivanka Muthumalage<sup>1</sup>, Michelle R. Friedman<sup>3</sup>, Matthew D. McGraw<sup>2</sup>, Alan E. Friedman<sup>4</sup>, and  
5  
6 Irfan Rahman<sup>1</sup>  
7

8 <sup>1</sup>Department of Environmental Medicine, <sup>2</sup>Division of Pediatric Pulmonology, University of  
9 Rochester Medical Center, School of Medicine & Dentistry, Rochester, NY,

10 <sup>3</sup>Department of Chemistry & Biochemistry, The College of Brockport, State University of New  
11 York, NY, <sup>4</sup>Department of Materials Design and Innovation, School of Engineering and Applied  
12 Sciences, University of Buffalo, Buffalo, NY, USA.  
13

14  
15  
16  
17  
18 Correspondence should be addressed to:

19 Irfan Rahman, Ph.D.  
20 Department of Environmental Medicine  
21 University of Rochester Medical Center  
22 Box 850, 601 Elmwood Avenue  
23 Rochester 14642, NY, USA  
24 Tel: 1 585 275 6911  
25 E-mail: [irfan\\_rahman@urmc.rochester.edu](mailto:irfan_rahman@urmc.rochester.edu)  
26

27 *The authors declare they have no actual or potential competing financial interests.*  
28  
29  
30  
31  
32  
33

34 **Short running title:** Chemical constituents involved in EVALI  
35

36 **Abstract**

37 Background: The Centers for Disease Control (CDC) declared e-cigarette (e-cig), or vaping  
38 product use-associated lung injury (EVALI) a national outbreak due to the high incidence of  
39 emergency department admissions and deaths. Investigators have identified vitamin E acetate  
40 (VEA) as the plausible cause for EVALI, based on compounds found in bronchoalveolar lavage  
41 fluid.

42 Objectives: We defined the chemical constituents present in e-cig cartridges associated with  
43 EVALI and compared constituents to medical-grade and cannabidiol (CBD) containing  
44 cartridges.

45 Methods: We measured chemicals and elemental metals in e-liquid and vapor phases of e-cig  
46 counterfeit cartridges by Gas Chromatography (GC) and Mass Spectrometry (MS), EPA method  
47 TO-15 by GCMS, and ICP-MS analysis.

48 Results: We have identified chemical constituents in e-cig vaping tetrahydrocannabinol (THC)-  
49 containing counterfeit cartridges compared to medical-grade and cannabidiol (CBD) containing  
50 cartridges. Apart from VEA and THC, other potential toxicants correlated with EVALI included  
51 solvent-derived hydrocarbons, silicon conjugated compounds, various terpenes,  
52 pesticides/plasticizers/polycaprolactones, and metals. These chemicals are known to cause  
53 symptoms, such as cough, shortness of breath or chest pain, nausea, vomiting or diarrhea,  
54 fatigue, fever, or weight loss, all symptoms presenting in patients with EVALI.

55 Conclusion: This study provides insights into understanding the chemical-induced disease  
56 mechanism of acute lung injury.

57

58 **Keywords:** Vaping, EVALI, VAPI, e-cigarette, THC, cannabis, lipoid-pneumonia

59

## 60 **Introduction**

61 Electronic cigarette (e-cig) use or vaping gained popularity in the past decade, especially among  
62 youth, due to the availability of many enticing flavors and devices. In August 2019, CDC started  
63 reporting e-cigarette, or vaping, product use-associated lung injury (EVALI) cases. The majority  
64 of patients with EVALI report vaping tetrahydrocannabinol (THC)-containing counterfeit street e-  
65 cig products. By December 2019, there have been over 2,500 hospitalized EVALI patients, most  
66 of whom are men younger than 35 years of age (Hartnett et al. 2019). Patients hospitalized with  
67 EVALI have manifested several radiological imaging patterns, such as lipid pneumonia,  
68 eosinophilic pneumonia, and chemical damage to the lung tissue (Henry et al. 2019; Lu et al.  
69 2020). Patients diagnosed with this illness have reported symptoms, such as cough, shortness  
70 of breath, or chest pain, nausea, vomiting, or diarrhea fatigue, fever, or weight loss (Kalininskiy  
71 et al 2019).

72 Counterfeit street cartridges are produced by using cutting agents, such as medium-chain  
73 triglyceride (MCT) oil, vitamin E (tocopherol) acetate (VEA), and seized drugs, such as butane  
74 hash oil (Layden et al. 2019). Currently, vitamin E acetate (VEA) has been identified as a key  
75 agent involved in EVALI (Blount et al. 2019b). However, VEA would not impose chemical-  
76 induced pneumonia, as VEA is protective in the lung upon aerosolization (Hybertson et al. ;  
77 Wang et al.). We hypothesized that, while VEA may be present in cartridges and BALF of  
78 patients with EVALI, there may be other constituents in these e-cig THC-containing cartridges  
79 that can act singularly, or in concert with other constituents, to induce augmented synergistic  
80 injuries to the lung.

81 Thus, in this study, we performed a screening for chemical constituents in liquid and vapor  
82 phases from counterfeit street cartridges. We also identified and compared the chemical  
83 constituents in CBD-containing cartridges and medical-grade vaping cartridges. Determining the

84 potential culprits in each category may help to understand the underlying mechanism of lung  
85 injury associated with e-cigarette or vaping use.

## 86 **Methods**

### 87 **Ethics statement on biosafety approval**

88 All experiments performed in this study were approved and in accordance with the University of  
89 Rochester Institutional Biosafety Committee.

### 90 **Counterfeit street/patient, CBD-containing, and medical-grade cartridges**

91 E-cig vaping counterfeit (bootleg/street), CBD-containing, and/or medical-grade cartridges  
92 (Columbia Care, TheraCeed, New York) were obtained from local vape shops and  
93 users/patients. The counterfeit street cartridge brands recovered from patients with EVALI  
94 (Kalininskiy et al 2019) included Dank Vape, ROVE, Super G Cookies, Runtz, Chronic Billy  
95 Kimber, Exotic (Paris OG), Jungle boys, Most Coast, Chronic Gushers, Chronic Gruntz, Jungle  
96 skittles, TKO, Clear Chronic, Exotic Carts, and Smart Carts. No manufacturers' details were  
97 given on cartridges or packing materials. The tested variants of cannabis oil included *sativa*,  
98 *indica*, and *hybrid*. Medical-grade cartridge was used as a known positive comparison control.

### 99 **Screening for chemical constituents in e-liquids by GCMS**

100 Chemical constituents in counterfeit or patient-provided (n=38), CBD-containing (n=4), and  
101 medical-grade (positive) e-cig vaping cartridges were determined by Gas Chromatography (GC)  
102 and Mass Spectrometry (MS).

103 E-cigarette liquids were diluted 100X into spectral grade methanol and injected into the GCMS  
104 detector (Agilent 7890A gas chromatograph with 5975 MSD detector). The system used helium  
105 as the carrier gas, flowing 1.2mL/min through an Agilent Technologies column (HP-5MS, 30m x  
106 0.250mm, 0.25  $\mu$ m, 19091S-433). The oven program initiated at 45°C for 1 minute, ramped to

107 285°C over 7 minutes at 10°C/min, ramped to 300°C for 10 minutes at 10°C/min, and finally  
108 ramped a third time to 325°C over 5 minutes at 5°C/min. The total run time was 53.5 minutes,  
109 and the injection volume was 1µL from a 10µL syringe. The samples were analyzed by electron  
110 impact ionization in positive ion mode with a mass range of 50-550m/z, with the source  
111 temperature at 230°C and the quadrupole at 150°C. Data analysis was performed using Agilent  
112 ChemStation software, with ion scans searched against the NIST database for identification.  
113 Chemicals commonly found in each category (counterfeit, CBD-containing, and medical-grade)  
114 of e-cig cartridges, but not found in other categories were identified and classified into terpenes,  
115 silicon compounds, pesticide constituents, flavor additives, cannabinoids, plasticizers/  
116 polycaprolactones (PCP)/drugs/manufacturing agents, humectants/oil/plant components,  
117 vitamin and conjugates, and miscellaneous constituents (**Table 1**).

#### 118 **Quantifying vapor phase chemical constituents**

119 Aerosols from e-cig vaping cartridges were sampled in 1L vacuum bottles, and each cartridge  
120 was sampled for 10 minutes with 10 puffs each. These samples were sent to ALS  
121 Environmental, CA, for analysis. Vapor phase constituents, including VOC, were screened and  
122 quantified by EPA method TO-15 and mass spectral library search for tentatively identified  
123 compounds. Most abundant compounds were then classified into groups based on their use,  
124 i.e., terpenes, manufacturing/pesticides, automotive, solvents, PCP/household, and  
125 miscellaneous constituents (**Table 2**).

#### 126 **Elemental analysis of cartridge liquids**

127 To screen for elements liquid aliquots from CBD-containing and counterfeit/patient-provided  
128 cartridges, ICP-MS analysis was performed. Total Quant KED analysis of elements used  
129 NeXion 2000 ICP-MS with external standards (20 ppb) solution in 2% nitric acid of 50 elements,  
130 adding helium gas at a rate of 4 mL/min. The solutions were pumped into a Meinhard nebulizer

131 cooled to 2°C. This generated an aerosol that was aspirated into the plasma torch, where  
132 ionization occurs. The ion beam was then detected by the mass spectrometer. The most  
133 abundant elements in the liquids, particularly metals, were then tabulated (**Table 3**).

## 134 **Results**

### 135 **Presence of unique chemicals in counterfeit patient-provided, CBD-containing, and** 136 **medical-grade e-cig vaping cartridges.**

137 More than 500 chemicals were found in tested cartridges. Chemical constituents peculiarly  
138 present in e-cig counterfeit patient-provided, CBD-containing, and medical-grade cartridges are  
139 listed in **Table 1**. The majority of the compounds in e-cig cartridges were terpenes and silicon  
140 compounds. Chemicals unique to e-cig counterfeit patient-provided specific cartridges include  
141 2,2-dimethoxybutane, tetramethyl silicate, decane, methyl esters, ethyl esters, siloxanes, and  
142 acetates, including  $\alpha$ -tocopherol/vitamin E acetate (VEA). Apart from the chemicals listed above,  
143 e-cig counterfeit patient cartridges consisted of many terpenes and their acetates. Other  
144 compounds present included benzophenone, glycerol tricaprylate and similar products, and  
145 THC and its derivatives.

146 In most e-cig vaping CBD-containing cartridges, cannabidiol was present as opposed to THC.  
147 Glycerin, siloxanes, and flavoring chemicals, such as ethyl vanillin and coumarin compounds,  
148 were found in CBD-containing e-cig cartridges.

149 In e-cig medical-grade cartridges, acetyl chloride, vitamin A retinol-conjugated compounds, such  
150 as retinol acetate, rather than VEA, were present.

### 151 **Vapor-phase constituents in counterfeit e-cig cartridges**

152 By screening for the vapor-phase constituents in counterfeit patient cartridges, we identified and  
153 quantified approximately 100 chemicals with concentrations ranging from 360,000  $\mu\text{g}/\text{m}^3$  to 169

154  $\mu\text{g}/\text{m}^3$  (**Table 2**). Predominantly these vapor-phase constituents were  
155 manufacturing/pesticides/automotive/industrial active and inert agents and solvents.

### 156 **Metal constituents in e-liquids**

157 Elemental analysis of the e-liquids from THC-containing counterfeit patient-provided cartridges  
158 was performed. Elements are presented in descending order, based on concentration found in  
159 the liquids (**Table 3**). In counterfeit patient-cartridges, the most abundant elements included Si,  
160 Cu, Ni, and Pb. These metal concentrations were highly variable between cartridges, though the  
161 concentrations reached as high as 600 ppm.

### 162 **Discussion**

163 In this study, we investigated the chemical constituents commonly found in e-cig vaping patient-  
164 provided counterfeit cartridges, CBD-cartridges, and medical cartridges. The presence of  
165 harmful compounds, such as MCT oil, VEA, and other lipids in THC-containing cartridges has  
166 been identified by the FDA/CDC (Blount et al. 2019a). At present, VEA has been linked as the  
167 causative agent based on bronchoalveolar lavage fluid (BALF) analyses in patients with EVALI  
168 (Blount et al. 2019b). Thus far, the EVALI epidemic has only been seen in North American  
169 populations, with very few cases reported in Canada (Stanbrook 2019). Interestingly, a recent  
170 study on e-cigarette ingredient analysis reported that there is no VEA in vaping products in the  
171 UK (Nyakutsikwa et al. 2019).

172 We determined the key constituents in counterfeit patient, CBD, and medical-grade e-cig vaping  
173 cartridges. We found several solvent chemicals, such as butane derivatives, i.e., 2,2  
174 dimethoxybutane and n-butane, in both liquid and vapor phases of counterfeit e-cig cartridges.  
175 This is likely a result of “dabbing” with butane hash oil. Dabbing an extraction procedure  
176 commonly practiced in making illicit street cartridges as shown to improve total THC-recovery  
177 and lung availability by greater than 70%, which is unachievable by smoking cannabis alone

178 (Hadener et al. 2019). Inhaling butane hash oil derivatives have already been seen as a  
179 probable cause for atypical/eosinophilic pneumonia in case reports (Anderson and Zechar 2019;  
180 McGraw et al. 2018).

181 The presence of hydrocarbons, such as decane and undecane, can also cause central nervous  
182 system damage, respiratory irritation, and even induce chemical pneumonitis (McKee et al.  
183 2015). Similar to the effects of aspirating kerosene, these hydrocarbon solvents may induce  
184 pulmonary edema, cause lesions, destruct alveolar and capillary membranes, and alter  
185 surfactant production and function (Brown and Armstrong 2019). Indeed, the volatile organic  
186 compounds (VOC) were emitted higher in counterfeit patient cartridges ( $20.03 \pm 0.59$ ) versus  
187 emitted by MCT ( $10.33 \pm 0.88$ ), Mineral oil ( $7.33 \pm 0.88$ ), and VEA ( $9.67 \pm 0.33$ , means  $\pm$  SE) as  
188 monitored by QTrack VOC monitor. Further, their particle concentrations ( $\text{mg}/\text{m}^3$ ) in aerosols  
189 were also higher measured as particulate matter (diameter 1.0, 2.5, and 10  $\mu\text{m}$ ) in counterfeit  
190 patient cartridges vs MCT, mineral oil, and VEA, by Dustrack II 8530 instrument. Interactions  
191 between these hydrocarbons, particulates and other organic oils, such as mineral oil, MCT oil,  
192 and coconut oil, may promote or delay the absorption and metabolism of these compounds  
193 (Gerarde 1959). However, given the nature of the disease manifestation of the reported cases  
194 of EVALI with neutrophil and eosinophil infiltration in the BALF, and their successful treatment  
195 with steroids, most of the cases may have been chemical-induced pneumonitis (Henry et al.  
196 2019; Triantafyllou et al. 2019).

197 In our chemical analysis, many conjugates and derivatives of silicon, such as silicates, silanes,  
198 and siloxanes, were identified only in e-cig counterfeit cartridges. Moreover, we also found large  
199 amounts of silica during elemental screening. These compounds, such as tetramethyl silicates,  
200 can form secondary products, such as silicon dioxide ( $\text{SiO}_2$ ) and methanol, which are highly  
201 toxic. Inhalation of silicon compounds is known to cause acute lung injury with pulmonary  
202 edema and lesions (NIOSH 2013).



203 It is believed that various hydrocarbons and reactive aldehydes are formed when e-liquids are  
204 heated to high temperatures around 500 °F. All these cartridges, including CBD containing  
205 cartridges, are used at the common voltages (e.g. 3.5V to 5.5 V) using a specific device (Chand  
206 et al. 2019). These conditions were used to generate aerosols for the detection of chemical  
207 constituents. Among the vapor-phase constituents, we found numerous known respiratory and  
208 cardiac toxicants specifically in e-cig counterfeit cartridges that are listed as harmful or  
209 potentially harmful constituents in tobacco products and tobacco smoke (HPHC) by the FDA.  
210 These compounds found in e-cig counterfeit cartridges include isoprene, acetaldehyde,  
211 ethylbenzene, toluene, acrolein, naphthalene, 1,3-butadiene, benzene, and vinyl chloride (FDA  
212 2012).

213 Even though we detected VEA, we did not see VEA in all patient-provided counterfeit/street  
214 cartridges, only some cartridges contained VEA. Interestingly, medical-grade cartridges  
215 (formulation in coconut oil) contained retinol (vitamin A) acetate rather than VEA. Though there  
216 were still harmful chemicals, such as acetyl chloride, benzene, aflatoxin b1 identified in medical-  
217 grade cartridges, the number of contaminants detected in these cartridges were fewer  
218 compared to e-cig counterfeit patient-provided cartridges.

219 In counterfeit patient cartridges, we also found a common constituent in nasal sprays,  
220 oxymetazoline (decongestant), an  $\alpha_1$  adrenergic receptor agonist. Common pesticide/insecticide  
221 ingredients, such as naphthalene and hexadecanoic, methyl ester were also detected in liquid  
222 and vapor phases of these e-cig counterfeit /patient cartridges. Exposure to very low levels of  
223 naphthalene, in both young and older mice, has been shown to induce acute cytotoxicity and  
224 injury to airway bronchiolar epithelial club cells (Carratt et al. 2019).

225 In the vapor-phase of e-cig counterfeit street cartridges, we detected many respiratory  
226 depressants and paralytic agents, such as 4-methyl-2 pentene, acetaldehyde, ethylbenzene,  
227 xylenes, and 1,3 pentadiene. Inhalation of these agents is likely the cause of symptoms, such

228 as dyspnea and chest tightness (common symptoms among EVALI patients). Inhalation of  
229 compounds, such as acetone and trans -1,2, dichloroethane, and vinyl chloride, can cause  
230 drowsiness, which is another common symptom among EVALI patients. Among the vapor  
231 phase chemicals, inhalation of alkanes, such as n-butane and n-octane, causes acute lung  
232 toxicity. Moreover, exposure to toxicants such as methyl vinyl ketone and allyl chloride is highly  
233 toxic and causes emphysema, edema, and even vision impairment.

234 Chemical constituents in counterfeit cartridges, e.g., 1,3-butadiene, can self-polymerize and  
235 form peroxides upon exposure to oxygen. These chemicals may react with other compounds  
236 and further be catalyzed into forming secondary products (Levin et al. 2004). Inhaled  
237 xenobiotics undergo metabolism via phase I (CYP450/monooxygenase) and phase II  
238 (transferases) forming metabolites and detoxification/elimination products. During these  
239 processes, toxic metabolites may be formed. For example 1,3-butadiene has possible  
240 intermediates that are DNA reactive metabolites, such as butadiene monoepoxide and  
241 butadiene diepoxide (Dahl and Gerde 1994). Aside from the detected e-liquid chemical  
242 constituents, the lipid derivatives from the 'endogenous' source, such as the epithelial lining fluid  
243 (ELF) and/or lung surfactants by interacting with exogenous hydrocarbons with phospholipids  
244 and surfactants of the ELF, may also occur. This may be associated with the inflammatory  
245 responses using these counterfeit cartridges seen in the lungs of patients with EVALI (Chand et  
246 al. 2019). It remains to be seen whether the identified chemicals have any role for pathological  
247 changes in the lung, such as centrilobular ground-glass nodules and ground-glass opacities with  
248 subpleural sparing, as seen in patients with EVALI.

249 One of the limitations of this study includes the qualitative nature of the found  
250 constituents/toxicants in cartridge liquids as the GC-MS method established for this study was  
251 for preliminary screening to determine the presence of all constituents. It is possible that the  
252 other States may have different counterfeit cartridges involved in EVALI, which need to

253 centralized for generating a library of chemicals identified in those cartridges for toxicological  
254 studies. Contributing susceptibility factors for EVALI pathogenesis may include genetic,  
255 environmental, lifestyle factors and concomitant diseases as not all THC-cartridge users were  
256 hospitalized for EVALI (Chatham-Stephens et al. 2019). The use of other vaping products, such  
257 as flavored e-liquids and pods with nicotine salts can be contributing and exacerbation factors to  
258 the pathogenesis of EVALI (Balmes 2020; Lu et al. 2020).

259 Legal restrictions on cannabis products limit research avenues to study the effects of these e-  
260 cig vaping products using surrogate models. Thus, there is a paucity of risk assessment and  
261 toxicological data on THC/cannabis containing products. Researchers and federal health  
262 organizations, such as the Centers for Disease Control (CDC) need to implement and adapt  
263 current e-cigarette research studies and clinical trials, and modify the established protocols to  
264 inform the participants and minimize the risk of developing EVALI.

265 In conclusion, our chemical analysis in e-cig counterfeit street/patient THC-containing cartridges  
266 showed numerous lethal respiratory toxicants in liquid and vapor phases, and the symptoms  
267 observed in patients are similar to what can be anticipated from inhaling those compounds. The  
268 potential toxicants include solvent derived hydrocarbons, silicon conjugated compounds, various  
269 terpenes, pesticides/plasticizers/polycaprolactones and metals. These chemicals are known to  
270 cause symptoms, such as cough, shortness of breath, or chest pain, nausea, vomiting, or  
271 diarrhea fatigue, fever, or weight loss as seen in patients with EVALI (Kalininskiy et al 2019).  
272 Our data suggest that exposure to a combination of hydrocarbons and oils, along with other  
273 toxic chemical compounds and metals, maybe a possible cause of EVALI as opposed to a  
274 singular causative agent. We are further investigating this using various *in vitro* and *in vivo*  
275 models before conclusively identifying the EVALI causative agent(s), as it may well be several  
276 agents involved in EVALI.

277 **Acknowledgments**

278 Funding source: None

279 The authors thank Gary Ginsberg, Ph.D. at the New York State Department of Health, for his  
280 active involvement and input on our ongoing EVALI studies.

281 The authors thank Daniel Croft, MD, and Nicholas Nacca, MD at the Strong Memorial Hospital,  
282 Rochester for providing us information on hospitalized patient cartridges.

283 We thank Mr. Thomas Scrimale at the metal analysis core at the University of Rochester for  
284 performing the elemental analysis.

285 We thank Mr. Petar Nastoski, The College at Brockport, for preparing samples, performing  
286 GC/MS analysis and data processing.

287 We thank ALS Environmental, CA, for processing aerosol samples for vapor-phase  
288 constituents.

289

290

### 291 **Author contributions**

292 Thivanka Muthumalage and Irfan Rahman conceived the study design, analyzed the data, wrote  
293 the manuscript, and edited the manuscript. Michelle Friedman and Alan Friedman performed  
294 the GCMS analysis and chemical identification, and edited the manuscript. Matthew McGraw  
295 and Michelle Friedman edited the manuscript.

296

297 **Conflict of interest:** The authors declare they have no actual or potential or perceived  
298 competing financial interests.

299

### 300 **References**

301 Anderson RP, Zechar K. 2019. Lung injury from inhaling butane hash oil mimics pneumonia.  
302 Respir Med Case Rep 26:171-173.

303

304 Balmes JR. 2020. Reply to: Are electronic cigarette users at risk for lipid-mediated lung injury?  
305 Am J Respir Crit Care Med.

- 306 Blount BC, Karwowski MP, Morel-Espinosa M, Rees J, Sosnoff C, Cowan E, et al. 2019a.  
307 Evaluation of bronchoalveolar lavage fluid from patients in an outbreak of e-cigarette, or vaping,  
308 product use-associated lung injury - 10 states, august-october 2019. *MMWR Morb Mortal Wkly*  
309 *Rep* 68:1040-1041.  
310
- 311 Blount BC, Karwowski MP, Shields PG, Morel-Espinosa M, Valentin-Blasini L, Gardner M, et al.  
312 2019b. Vitamin e acetate in bronchoalveolar-lavage fluid associated with evali. *N Engl J Med*.  
313 Dec 20. doi: 10.1056/NEJMoa1916433  
314
- 315 Brown KW, Armstrong TJ. 2019. Hydrocarbon inhalation. In: Statpearls. Treasure Island (FL).  
316 Carratt SA, Kovalchuk N, Ding X, Van Winkle LS. 2019. Metabolism and lung toxicity of inhaled  
317 naphthalene: Effects of postnatal age and sex. *Toxicol Sci* 170:536-548.  
318
- 319 Chand HS, Muthumalage TM, Maziak W, Rahman I. 2019. Pulmonary toxicity and the  
320 pathophysiology of electronic cigarette, or vaping product, use associated lung injury. *Front*  
321 *Pharmacol*. doi: 10.3389/fphar.2019.01619  
322
- 323 Chatham-Stephens K, Roguski K, Jang Y, Cho P, Jatlaoui TC, Kabbani S, et al. 2019.  
324 Characteristics of hospitalized and nonhospitalized patients in a nationwide outbreak of e-  
325 cigarette, or vaping, product use-associated lung injury - united states, november 2019. *MMWR*  
326 *Morb Mortal Wkly Rep* 68:1076-1080.  
327
- 328 Dahl AR, Gerde P. 1994. Uptake and metabolism of toxicants in the respiratory tract. *Environ*  
329 *Health Perspect* 102 Suppl 11:67-70.  
330
- 331 FDA. 2012. Harmful and potentially harmful constituents in tobacco products and tobacco  
332 smoke: Established list.  
333
- 334 Gerarde HW. 1959. Toxicological studies on hydrocarbons. V. Kerosine. *Toxicol Appl*  
335 *Pharmacol* 1:462-474.  
336
- 337 Hadener M, Vieten S, Weinmann W, Mahler H. 2019. A preliminary investigation of lung  
338 availability of cannabinoids by smoking marijuana or dabbing bho and decarboxylation rate of  
339 thc- and cbd-acids. *Forensic Sci Int* 295:207-212.  
340
- 341 Hartnett KP, Kite-Powell A, Patel MT, Haag BL, Sheppard MJ, Dias TP, et al. 2019. Syndromic  
342 surveillance for e-cigarette, or vaping, product use-associated lung injury. *N Engl J Med*.  
343 Henry TS, Kanne JP, Kligerman SJ. 2019. Imaging of vaping-associated lung disease. *N Engl J*  
344 *Med* 381:1486-1487.  
345
- 346 Hybertson BM, Chung JH, Fini MA, Lee YM, Allard JD, Hansen BN, et al. 2005. Aerosol-  
347 administered alpha-tocopherol attenuates lung inflammation in rats given lipopolysaccharide  
348 intratracheally. *Exp Lung Res* 31:283-294.  
349
- 350 Layden JE, Ghinai I, Pray I, Kimball A, Layer M, Tenforde M, et al. 2019. Pulmonary illness  
351 related to e-cigarette use in illinois and wisconsin - preliminary report. *N Engl J Med*. doi:  
352 10.1056/NEJMoa1911614  
353
- 354 Levin ME, Hill AD, Zimmerman LW, Paxson TE. 2004. The reactivity of 1,3-butadiene with  
355 butadiene-derived popcorn polymer. *J Hazard Mater* 115:71-90.

- 357 Lu MA, Jabre NA, Mogayzel PJ, Jr. 2020. Vaping-related lung injury in an adolescent. *Am J*  
358 *Respir Crit Care Med*. doi: 10.1164/rccm.201909-1786IM  
359
- 360 McGraw MD, Houser GH, Galambos C, Wartchow EP, Stillwell PC, Weinman JP. 2018.  
361 Marijuana medusa: The many pulmonary faces of marijuana inhalation in adolescent males.  
362 *Pediatr Pulmonol* 53:1619-1626.  
363
- 364 McKee RH, Adenuga MD, Carrillo JC. 2015. Characterization of the toxicological hazards of  
365 hydrocarbon solvents. *Crit Rev Toxicol* 45:273-365.  
366
- 367 NIOSH. 2013. Silicic acid, tetramethyl ester. In: Registry of toxic effects of chemical substances,  
368 (Prevention CfDCA, ed).  
369
- 370 Nyakutsikwa B, Britton J, Bogdanovica I, Langley T. 2019. Vitamin e acetate is not present in  
371 licit e-cigarette products available on the uk market. *Addiction*. doi: 10.1111/add.14920.  
372
- 373 Stanbrook MB. 2019. Vaping-associated lung illnesses highlight risks to all users of electronic  
374 cigarettes. *CMAJ* 191:E1319-E1320.  
375
- 376 Triantafyllou GA, Tiberio PJ, Zou RH, Lamberty PE, Lynch MJ, Kreit JW, et al. 2019. Vaping-  
377 associated acute lung injury: A case series. *Am J Respir Crit Care Med* 200:1430-1431.  
378
- 379 Wang S, Sun NN, Zhang J, Watson RR, Witten ML. 2002. Immunomodulatory effects of high-  
380 dose alpha-tocopherol acetate on mice subjected to sidestream cigarette smoke. *Toxicology*  
381 175:235-245.

382

383

#### 384 **Tables**

385 **Table 1: Commonly present constituents in counterfeit, CBD, and medical-grade e-cig**  
386 **vaping counterfeit cartridges.**

387 **Table 2: Vapor phase constituents in counterfeit e-cig cartridges.**

388 **Table 3: Elemental analysis of e-cig counterfeit cartridge liquids**

389

**Table 1:** Commonly present constituents in counterfeit, CBD-containing, and medical-grade cartridges.

| Terpenes                                                            |                                      |                                                                                                                                             |
|---------------------------------------------------------------------|--------------------------------------|---------------------------------------------------------------------------------------------------------------------------------------------|
| Counterfeit Patient Cartridges                                      | CBD-containing Cartridges            | Medical-grade Cartridges                                                                                                                    |
| 6,6-dimethyl-2-methylene-, [1S]-bicyclo[3,1,1]heptane               | 1,6-Octadien-3-ol, 3,7-dimethyl-     | Azulene, 1,2,3,5,6,7,8,8a-octahydro-1,4-dimethyl-7-(1-methylethenyl)-, [1S-(1alpha,7alpha,8abeta)]-                                         |
| β-pinene                                                            |                                      | 1H-cyclopenta[1,3]cyclopropa [1,2]benzene, octahydro-7-methyl-3-methylene-4-(1-methylethyl)-, [3aS-(3aalpha,3bbeta,4beta,7alpha,7alphaS*)]- |
| Bicyclo[3.1.1]heptane, 6,6-dimethyl-2-methylene-, (1S)-             |                                      | Decanoic acid, 1,1a,1b,4,4a,5,7a,7b,8,9-decahydro-4a,7b-dihydroxy-3-(hydroxymethyl)-1,1,6,8-tetramethyl-5-oxo-9aH-cycloprop                 |
| β-Myrcene                                                           |                                      |                                                                                                                                             |
| D-Limonene                                                          |                                      |                                                                                                                                             |
| Cyclohexene, 1-methyl-4-(1-methylethylidene)-                       |                                      |                                                                                                                                             |
| 1,6-Octadien-3-ol, 3,7-dimethyl-                                    |                                      |                                                                                                                                             |
| 3-Cyclohexene-1-methanol, α,α,4-trimethyl-                          |                                      |                                                                                                                                             |
| Caryophyllene                                                       |                                      |                                                                                                                                             |
| α-Caryophyllene                                                     |                                      |                                                                                                                                             |
| Caryophyllene oxide                                                 |                                      |                                                                                                                                             |
| Phytol                                                              |                                      |                                                                                                                                             |
| Squalene                                                            |                                      |                                                                                                                                             |
| Silicon compounds                                                   |                                      |                                                                                                                                             |
| Counterfeit Patient Cartridges                                      | CBD-containing Cartridges            | Medical-grade Cartridges                                                                                                                    |
| Cyclohexasiloxane, dodecamethyl-                                    | 1-butyl[dimethyl]silyloxypropane     | 1,3-bis(trimethylsiloxy)benzene                                                                                                             |
| Cycloheptasiloxane, tetradecamethyl-                                | Dodecamethyl-cyclohexasiloxane       |                                                                                                                                             |
| Hexadecamethyl-cyclooctasiloxane                                    | Cycloheptasiloxane, tetradecamethyl- |                                                                                                                                             |
| Cyclononasiloxane, octadecamethyl-                                  | Hexadecamethyl-cyclooctasiloxane     |                                                                                                                                             |
| Cyclodecasiloxane, eicosamethyl-                                    | Octadecamethyl-cyclononasiloxane     |                                                                                                                                             |
| Octasiloxane, 1,1,3,3,5,5,7,7,9,9,11,11,13,13,15,15-hexadecamethyl- |                                      |                                                                                                                                             |
| Tetramethyl silicate                                                |                                      |                                                                                                                                             |
| Benzyloxy(butyl)dimethylsilane                                      |                                      |                                                                                                                                             |
| Silane, (1,1-dimethylethyl)dimethyl (phenylmethoxy)-                |                                      |                                                                                                                                             |
| Cyclotrisiloxane, hexamethyl-                                       |                                      |                                                                                                                                             |
| Cyclooctasiloxane, hexadecamethyl-                                  |                                      |                                                                                                                                             |
| 1,1,3,3,5,5,7,7,9,9,11,11,13,13,15,15-hexadecamethyl-octasiloxane   |                                      |                                                                                                                                             |
| Pesticide constituents                                              |                                      |                                                                                                                                             |
| Counterfeit Patient Cartridges                                      | CBD-containing Cartridges            | Medical-grade Cartridges                                                                                                                    |
| Decanoic acid, methyl ester                                         |                                      |                                                                                                                                             |
| Hexadecanoic acid, methyl ester                                     |                                      |                                                                                                                                             |
| Flavor additives                                                    |                                      |                                                                                                                                             |
| Counterfeit Patient Cartridges                                      | CBD-containing Cartridges            | Medical-grade Cartridges                                                                                                                    |
| Calarene epoxide                                                    | 3-ethoxy-1,2-propanediol             | Nonanoic acid, methyl ester                                                                                                                 |

|                                                                                                                    |                                                                                         |                                                                                                           |
|--------------------------------------------------------------------------------------------------------------------|-----------------------------------------------------------------------------------------|-----------------------------------------------------------------------------------------------------------|
| Furo[2,3-H]coumarine, 2-(1-hydroxyethyl)-1,6-dimethyl-                                                             | Ethyl vanillin                                                                          | 10-undecyanoic acid, methyl ester                                                                         |
| Octanoic acid, methyl ester                                                                                        | 1,6,10-dodecatrien-3-ol, 3,7,11-trimethyl-, [S-(Z)]-                                    | Ethyl cyclohexapropionate                                                                                 |
| <b>Cannabinoids</b>                                                                                                |                                                                                         |                                                                                                           |
| <b>Counterfeit Patient Cartridges</b>                                                                              | <b>CBD-containing Cartridges</b>                                                        | <b>Medical-grade Cartridges</b>                                                                           |
| δ9-Tetrahydrocannabivarin                                                                                          | 6H-Dibenzo[b,d]pyran-9-methanol, 6a,7,8,10a-tetrahydro-1-hydroxy-6,6-dimethyl-3-pentyl- |                                                                                                           |
| 1,3-Benzenediol, 2-(3,7-dimethyl-2,6-octadienyl)-5-pentyl-                                                         |                                                                                         |                                                                                                           |
| 1H-4-Oxabenzo(f)cyclobut(cd)inden-8-ol, 1a-α,2,3,3a,8b-α,8c-α-hexahydro-1,1,3a-trimethyl-6-pentyl-                 |                                                                                         |                                                                                                           |
| <b>Plasticizer/Polycaprolactone/drugs/manufacturing</b>                                                            |                                                                                         |                                                                                                           |
| <b>Counterfeit Patient Cartridges</b>                                                                              | <b>CBD-containing Cartridges</b>                                                        | <b>Medical-grade Cartridges</b>                                                                           |
| Benzophenone                                                                                                       |                                                                                         | 1,6,10-dodecatriene, 7,11-dimethyl-3-methylene-, (Z)-                                                     |
| Hexadecanoic acid, methyl ester                                                                                    |                                                                                         | Pyrrrolidine, 1-acetyl                                                                                    |
| Benzoic acid, 4-ethoxy-, ethyl ester                                                                               |                                                                                         | Cyclopenta[c]furo[3',2'4,5]furo[2,3-h][1]benzopyran-1,11-dione,2,3,6a,9a-tetrahydro-4-methoxy-, (6aR-cis) |
| Oxymetazoline                                                                                                      |                                                                                         |                                                                                                           |
| Glycerol tricaprylate                                                                                              |                                                                                         |                                                                                                           |
| Pregn-9(11)-en-20-ol-3-on-19-oic acid lactone                                                                      |                                                                                         |                                                                                                           |
| Pregna-5,15-dien-20-one, 3-hydroxy-16-methyl-,(3β)                                                                 |                                                                                         |                                                                                                           |
| <b>Humectants/Oil/ Plant components</b>                                                                            |                                                                                         |                                                                                                           |
| <b>Counterfeit Patient Cartridges</b>                                                                              | <b>CBD-containing Cartridges</b>                                                        | <b>Medical-grade Cartridges</b>                                                                           |
| Ribitol, 1,3:2,4-di-O-benzylidene-                                                                                 | R-(-)-1,2-propanediol                                                                   | 5-hepten-2-one, 6-methyl                                                                                  |
| Decanoic acid, 1,2,3-propanetriyl ester                                                                            | Diglycerol                                                                              | Benzene, 1,3-bis(1,1-dimethylethyl)-                                                                      |
| 12-oleanen-3-yl acetate, (3α)-                                                                                     | Glycerin                                                                                | Octanoic acid, ethyl ester                                                                                |
| <b>Vitamins and conjugates</b>                                                                                     |                                                                                         |                                                                                                           |
| <b>Counterfeit Patient Cartridges</b>                                                                              | <b>CBD-containing Cartridges</b>                                                        | <b>Medical-grade Cartridges</b>                                                                           |
| 2H-1-Benzopyran-6-ol, 3,4-dihydro-2,5,7,8-tetramethyl-2-(4,8,12-trimethyltridecyl)-, acetate, [2R-[2R*(4R*,8R*)]]- |                                                                                         | Retinol, acetate                                                                                          |
| Vitamin E                                                                                                          |                                                                                         |                                                                                                           |
| <b>Miscellaneous</b>                                                                                               |                                                                                         |                                                                                                           |
| <b>Counterfeit Patient Cartridges</b>                                                                              | <b>CBD-containing Cartridges</b>                                                        | <b>Medical-grade Cartridges</b>                                                                           |
| 2,2-Dimethoxybutane                                                                                                |                                                                                         | Acetyl chloride                                                                                           |
| Undecane                                                                                                           |                                                                                         |                                                                                                           |



**Table 2: Vapor phase constituents in counterfeit cartridges**

| Terpenes           | Manufacturing/pesticides/automotive | Solvents              | PCP-Polycaprolactone/<br>household | Miscellaneous            |
|--------------------|-------------------------------------|-----------------------|------------------------------------|--------------------------|
| Isoprene*          | 4-Methyl-2-pentene                  | Ethanol               | 1,3-Cyclohexadiene                 | 2-Methylpropene          |
| Camphene           | 1-Pentene                           | Acetone               | 3,3-Dimethyl-1-butene              | 1-Hexene                 |
| β-Pinene           | Vinyl Acetate                       | Ethylbenzene*         | α -Fenchene                        | 1,3-Pentadiene           |
| β-Myrcene          | C5H10 Compound                      | Toluene-d8            | 1,4-Dichlorobenzene                | 1,4-Pentadiene           |
| p-Isopropyltoluene | n-Butanal                           | 2-Propanol            | n-Nonane                           | Methacrolein             |
| (+)-4-Carene       | Acrylonitrile                       | 2-Hexanone            | 4-Ethyltoluene                     | Propyne                  |
| γ -Terpinene       | Acetonitrile                        | Bromoform             | Trichlorotrifluoroethane           | C5H6 Compound            |
| d-Limonene         | Styrene                             | Tetrahydrofuran       | Carbon tetrachloride               | C6H12 Compound           |
| α-Pinene           | n-Octane                            | 1,1-Dichloroethene    |                                    | Acetaldehyde*            |
|                    | 3-Chloro-1-propene (allyl chloride) | Toluene*              |                                    | 2,4-Hexadiene            |
|                    | Dibromochloromethane                | 1,1,2-Trichloroethane |                                    | n-Pentane                |
|                    | 1,2-Dibromo-3-chloropropane         | Methylene chloride    |                                    | Methyl vinyl ketone      |
|                    | 1,2-Dibromoethane                   | Trichloroethene       |                                    | Bromofluorobenzene       |
|                    | cis-1,3-Dichloropropene             | 1,1,1-Trichloroethane |                                    | Methyl Methacrylate      |
|                    | Tetrachloroethene                   |                       |                                    | Acrolein*                |
|                    | Naphthalene*                        |                       |                                    | 2-Butanone (MEK)         |
|                    | Chloroethane                        |                       |                                    | 1,4-Dioxane              |
|                    | trans-1,3-Dichloropropene           |                       |                                    | trans-1,2-Dichloroethene |
|                    | 1,3,5-Trimethylbenzene              |                       |                                    | 1,2-Dichlorobenzene      |
|                    | 1,1,2,2-Tetrachloroethane           |                       |                                    | n-Heptane                |
|                    | Cumene                              |                       |                                    | cis-1,2-Dichloroethene   |
|                    | Chlorobenzene                       |                       |                                    | Propene                  |
|                    | Methyl tert-butyl ether             |                       |                                    |                          |
|                    | 1,2-Dichloropropane                 |                       |                                    |                          |
|                    | o-Xylene                            |                       |                                    |                          |
|                    | 1,2,4-Trimethylbenzene              |                       |                                    |                          |
|                    | 1,3-Butadiene*                      |                       |                                    |                          |
|                    | n-Hexane                            |                       |                                    |                          |
|                    | Bromomethane                        |                       |                                    |                          |
|                    | Benzyl Chloride                     |                       |                                    |                          |
|                    | Carbon Disulfide                    |                       |                                    |                          |

| Terpenes | Manufacturing/pesticides/automotive              | Solvents | PCP/household | Miscellaneous |
|----------|--------------------------------------------------|----------|---------------|---------------|
|          | Chloromethane                                    |          |               |               |
|          | Bromodichloromethane                             |          |               |               |
|          | Chloroform                                       |          |               |               |
|          | Benzene*                                         |          |               |               |
|          | Vinyl chloride*                                  |          |               |               |
|          | Dichlorodifluoromethane (CFC 12)                 |          |               |               |
|          | Trichlorofluoromethane                           |          |               |               |
|          | 1,2-Dichloroethane                               |          |               |               |
|          | 1,2-Dichloro-1,1,2,2-tetrafluoroethane (CFC 114) |          |               |               |

\*Constituents classified as harmful or potentially harmful constituents in tobacco products and tobacco smoke (HPHC) by the FDA.

**Table 3: Elemental analysis of counterfeit cartridge liquids**

|                                |                                                                                                                                                                                                 |
|--------------------------------|-------------------------------------------------------------------------------------------------------------------------------------------------------------------------------------------------|
| Counterfeit-patient cartridges | Si, Na, K, Ca, Zn, Mg, Ni, Bi, Cu, Ba, Al, Fe, Sr, Zr, Hf, Pb, Ir, Ta, Nb, Pd, Sn, Co, Hg, W, Cr, Mn, Mo, Rb, V, Cd, Rh, U, Sb, As, Ag, Pt, Ti, Li, Ga, In, Cs, Re, Gd, Ge, Au, Te, Be, Se, Ru. |
|--------------------------------|-------------------------------------------------------------------------------------------------------------------------------------------------------------------------------------------------|
